# Supplementary material
Source: PubMed Central journal article supplement (PMC7070172)
Supplement: BPH-177-1806-s001.pdf [file BPH-177-1806-s001.pdf]

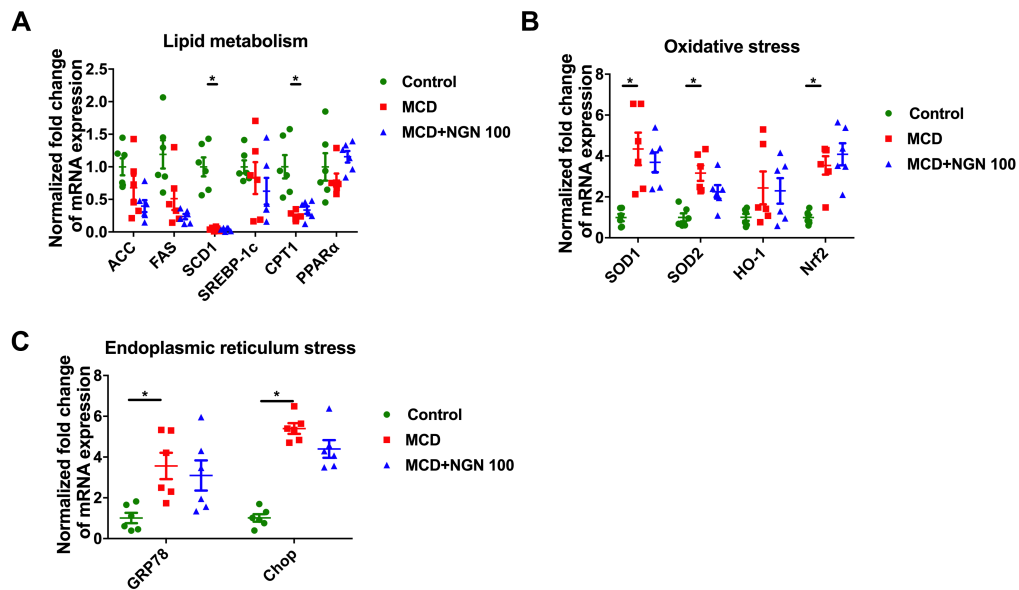

**s-Fig.1. NGN had no significant regulatory effects on the mRNA expression of the genes related to lipid metabolism, oxidative stress and endoplasmic reticulum stress.** (A) mRNA expression of lipid metabolism genes. (B) mRNA expression of oxidative stress genes. (C) mRNA expression of endoplasmic reticulum stress genes. n=6 in each group.

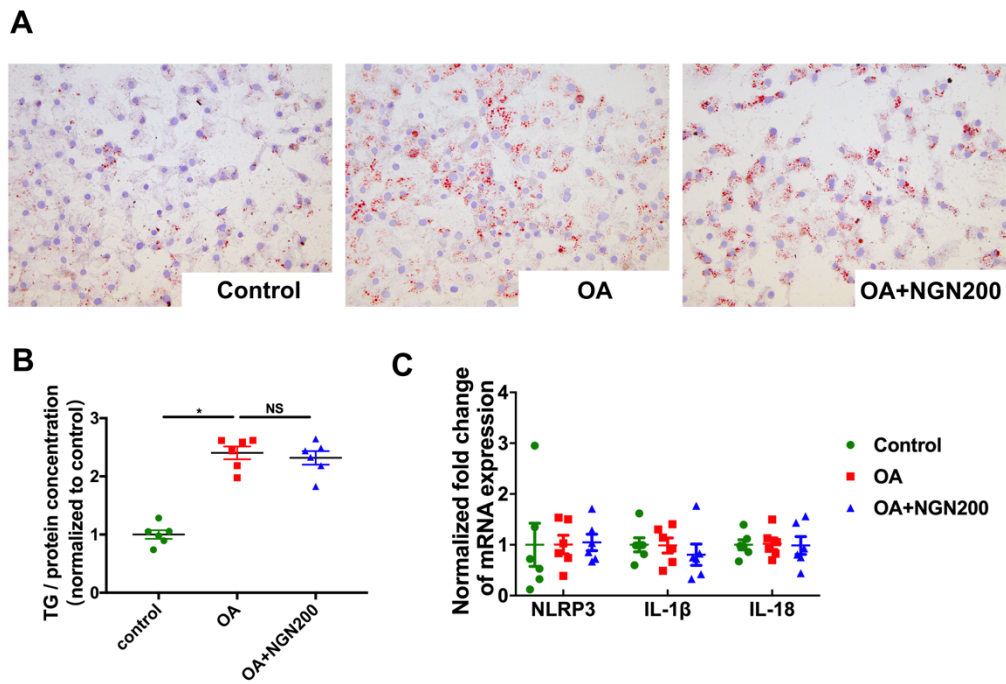

**s-Fig.2. NGN could not attenuate lipid accumulation stimulated by OA alone in HepG2 cells.** (A) Oil red O staining of OA-stimulated HepG2 cells. (B) The content of TG in HepG2 cells. (C) mRNA expression of NLRP3, IL-1 $\beta$  and IL-18. n=6 in each group.

**s-Table 1 Primers used for qPT-PCR experiments**

| Genes                  |         | Sequences                 |
|------------------------|---------|---------------------------|
| TNF- $\alpha$ (mouse)  | forward | CCCTCACACTCAGATCATCTTCT   |
|                        | reverse | GCTACGACGTGGGCTACAG       |
| IL-18 (mouse)          | forward | GACTCTTGCGTCAACTTCAAGG    |
|                        | reverse | CAGGCTGTCTTTTGTCAACGA     |
| IL-1 $\beta$ (mouse)   | forward | GAAATGCCACCTTTTGACAGTG    |
|                        | reverse | TGGATGCTCTCATCAGGACAG     |
| IL-6 (mouse)           | forward | TAGTCCTTCTACCCCAATTTCC    |
|                        | reverse | TTGGTCCTTAGCCACTCCTTC     |
| NF- $\kappa$ B (mouse) | forward | ATGGCAGACGATGATCCCTAC     |
|                        | reverse | TGTTGACAGTGGTATTTCTGGTG   |
| NLRP3 (mouse)          | forward | ATTACCCGCCCGAGAAAGG       |
|                        | reverse | TCGCAGCAAAGATCCACACAG     |
| GAPDH (mouse)          | forward | TCCTTGGAGGCCATGTGGGCCAT   |
|                        | reverse | TGATGACATCAAGAAGGTGGTGAAG |
| ACC (mouse)            | forward | ATGGGCGGAATGGTCTCTTTC     |
|                        | reverse | TGGGGACCTTGTCTTCATCAT     |
| FAS (mouse)            | forward | TATCAAGGAGGCCCATTTTGC     |
|                        | reverse | TGTTTCCACTTCTAAACCATGCT   |
| SCD1 (mouse)           | forward | TTCTTGCGATACTCTGGTGC      |
|                        | reverse | CGGGATTGAATGTTCTTGTCGT    |
| SREBP-1c (mouse)       | forward | GCAGCCACCATCTAGCCTG       |
|                        | reverse | CAGCAGTGAGTCTGCCTTGAT     |
| CPT1 (mouse)           | forward | CTCCGCCTGAGCCATGAAG       |
|                        | reverse | CACCAGTGATGATGCCATTCT     |
| PPAR $\alpha$ (mouse)  | forward | AGAGCCCCATCTGTCCTCTC      |
|                        | reverse | ACTGGTAGTCTGCAAACCCAAA    |
| SOD1 (mouse)           | forward | AACCAGTTGTGTTGTCAGGAC     |
|                        | reverse | CCACCATGTTTCTTAGAGTGAGG   |
| SOD2 (mouse)           | forward | CAGACCTGCCTTACGACTATGG    |
|                        | reverse | CTCGGTGGCGTTGAGATTGTT     |
| HO-1 (mouse)           | forward | AAGCCGAGAATGCTGAGTTCA     |
|                        | reverse | GCCGTGTAGATATGGTACAAGGA   |
| Nrf2 (mouse)           | forward | CTTTAGTCAGCGACAGAAGGAC    |
|                        | reverse | AGGCATCTTGTTTGGGAATGTG    |
| GRP78 (mouse)          | forward | GCCTGTATTTCTAGACCTGCC     |
|                        | reverse | TTCATCTTGCCAGCCAGTTG      |
| Chop (mouse)           | forward | AATCAGAGCTGGAACCTGAGGA    |
|                        | reverse | TGCTTTCAGGTGTGGTGATGTATG  |
| NLRP3 (human)          | forward | GATCTTCGCTGCGATCAACAG     |
|                        | reverse | CGTGCATTATCTGAACCCAC      |
| IL-1 $\beta$ (human)   | forward | CAGAAGTACCTGAGCTCGCC      |
|                        | reverse | AGATTCGTAGCTGGATGCCG      |

---

|                        |         |                         |
|------------------------|---------|-------------------------|
| IL-18 (human)          | forward | TCTTCATTGACCAAGGAAATCGG |
|                        | reverse | TCCGGGGTGCATTATCTCTAC   |
| $\beta$ -actin (human) | forward | GTCATTCCAAATATGAGATGCGT |
|                        | reverse | GCTATCACCTCCCCTGTGTG    |

---
